# Supplementary material for: Wnt3a-stimulated LRP6 phosphorylation is dependent upon arginine methylation of G3BP2
Source: PubMed Central journal article supplement — J Cell Sci. 2012 May 15;125(10):2446–56. doi: 10.1242/jcs.100933 (PMC3383259; doi:10.1242/jcs.100933), 2012-05-15
Supplement: supp_125.10.2446_JCS100933TableS1.pdf [file supp_125.10.2446_JCS100933TableS1.pdf]

**Table S1. List of primers**

| Gene                   | Primer sequence                         |
|------------------------|-----------------------------------------|
| mG3BP2 sense           | gaagatctcatggttatggagaagcccag           |
| mG3BP2 antisense       | ataagaatgcggccgctcaacgacgctgtcctgtga    |
| mG3BP2 R418K sense     | gccagagagcgagaaaccaagggtggtggcgatgaccgc |
| mG3BP2 R418K antisense | ggggtcatcgccaccaccttggttctctcgtctctggc  |
| mG3BP2 R432K sense     | gatatcaggcgcaatgataagggtcctggtggtccacgt |
| mG3BP2 R432K antisense | acgtggaccaccaggaccttatcattgcgcctgatatc  |
| mG3BP2 R438K sense     | cggggtcctggtggtccaaaaggaattggtggtggtgga |
| mG3BP2 R438K antisense | tccaccaccacaattccttttgaccaccaggacccccg  |
| mG3BP2 R452K sense     | atgctgatcgtgacggaaaaggccacctccacgaggt   |
| mG3BP2 R452K antisense | acctcgtggaggtggccctttccgtcacgatcacgcat  |
| mG3BP2 R457K sense     | ggaagaggccacctcaaaaagggtggcatgacacagaaa |
| mG3BP2 R457K antisense | ttctgtgcatgccacctttggaggtggcctcttcc     |
| mG3BP2 R468K sense     | cagaaaactggttctgaaaaggaaccgggcaaatggaa  |
| mG3BP2 R468K antisense | ttcattgcccggttcctttccagaaccaagttctg     |
| mPRMT1 sense           | cggaattccgatggcggcagccgagggccgc         |
| mPRMT1 antisense       | ggggtacctcagcgcacccgtagtcgg             |
| mPRMT2 sense           | gaagatctcatggaggcaccaggagaagg           |
| mPRMT2 antisense       | ataagaatgcggccgctcacctccagatcgaaaaga    |
| mPRMT3 sense           | ggggtaccatgttctgctagcggcggg             |
| mPRMT3 antisense       | ataagaatgcggccgctcactggagactgtaagtct    |
| mPRMT4 sense           | gaagatctcatggcagcggcggcagcgac           |
| mPRMT4 antisense       | ataagaatgcggccgctaactcccatagtgcatgg     |
| mPRMT5 sense           | gaagatctcatggcggcgatggcagtcgg           |
| mPRMT5 antisense       | ataagaatgcggccgcttagaggccaatggtat       |
| mPRMT6 sense           | gaagatctcatgctgctgagcaagaaaag           |
| mPRMT6 antisense       | ataagaatgcggccgctcagtcctccatggcaa       |
| mPRMT7 sense           | gaagatctcatgaaggtcttctgtggccg           |
| mPRMT7 antisense       | ataagaatgcggccgctcagctcaaggtgcttgcga    |
| mPRMT8 sense           | gaagatctcatggcggagaatgcagtcga           |
| mPRMT8 antisense       | ataagaatgcggccgctaaccgcatftttagtcat     |
